# Supplementary material
Source: PubMed Central journal article supplement (PMC4786911)
Supplement: mt2015190x1.pdf [file mt2015190x1.pdf]

# Supplemental Figure 1

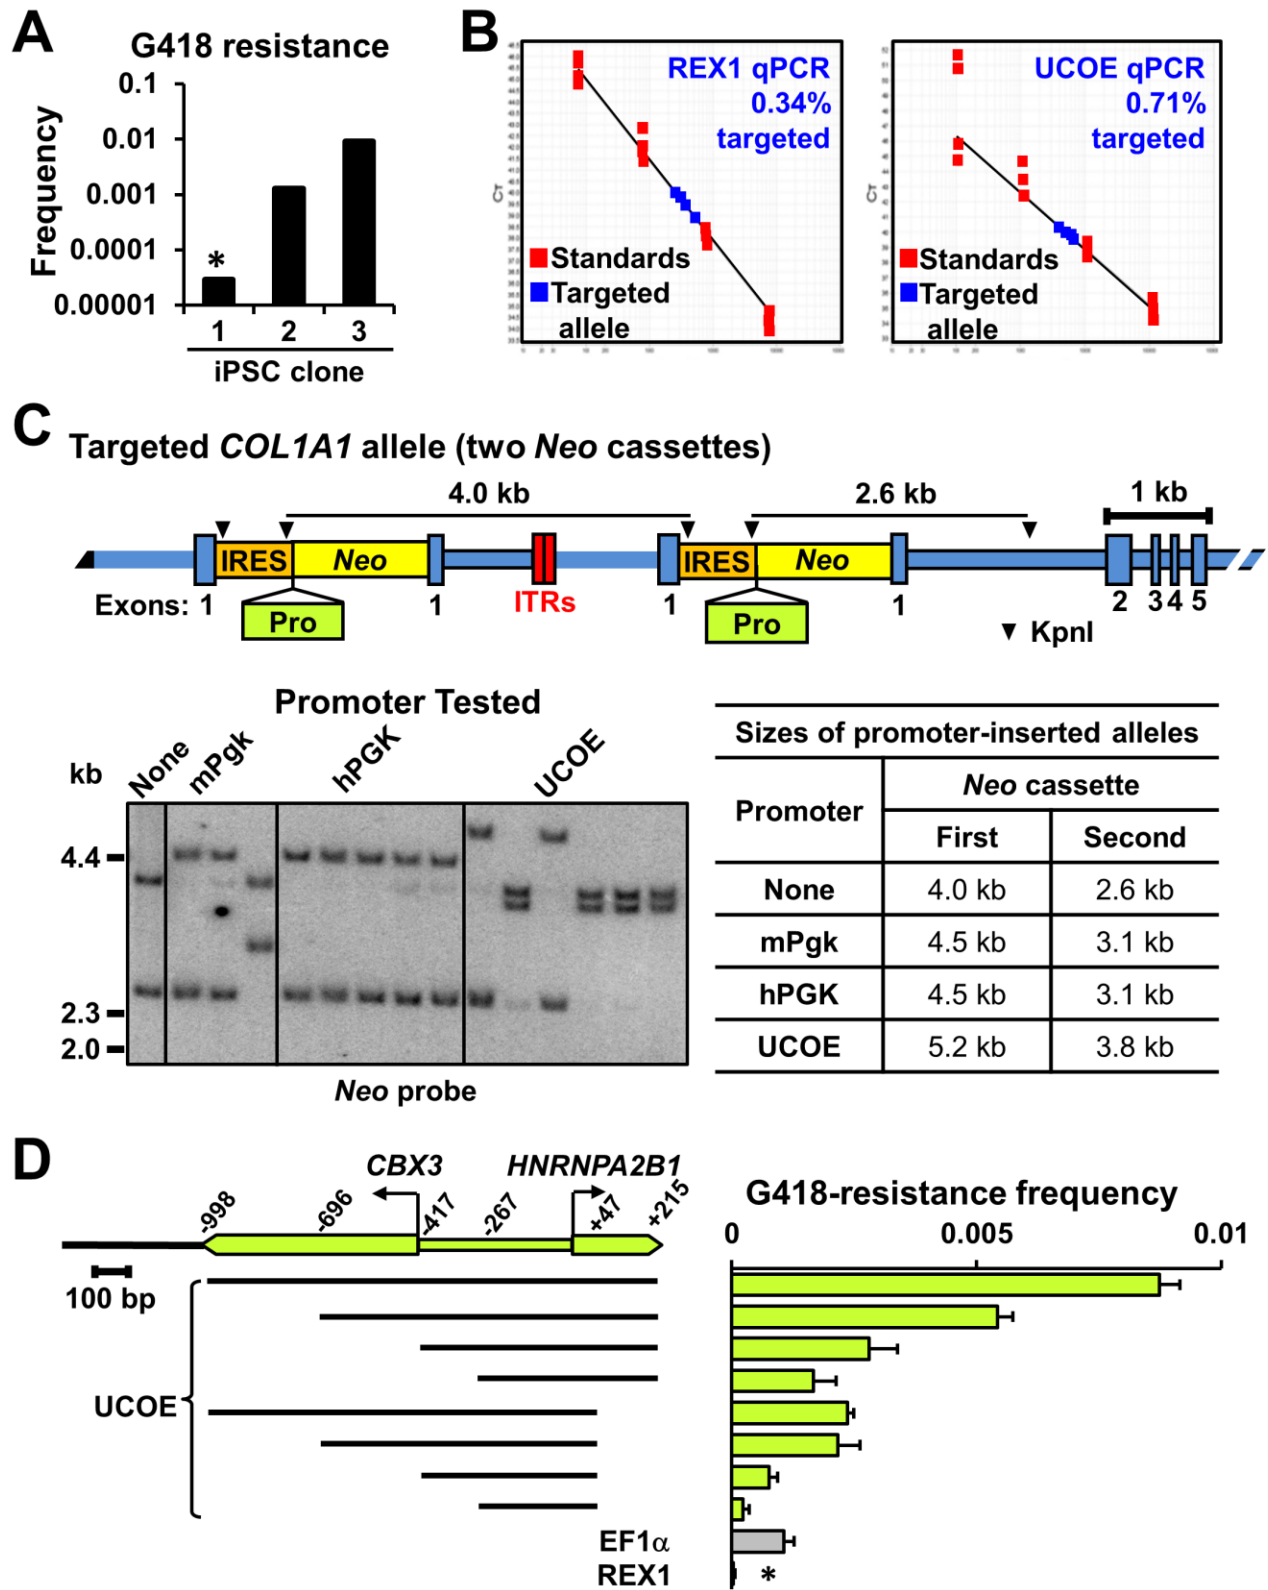

**Figure S1. Targeting a silent *COL1A1*-IRES-Neo cassette.** (a) Spontaneous G418 resistance frequencies of iPSC clones 1, 2 and 3 containing a silenced IRES-Neo cassette in *COL1A1*. \*, <  $2 \times 10^{-5}$ . (b) Examples of qPCR measurements of homologous recombination frequencies when inserting a REX1 or UCOE promoter into the *COL1A1*-IRES-Neo cassette of iPSC clone 1. Red squares, standard values obtained with a cloned reconstructed targeted allele mixed with a wild-type genome; blue squares, sample measurements. Primer locations are shown in Figure 1c. (c) Structure of the *COL1A1*-IRES-Neo cassette dimer in iPSC clone 1 with promoter insertion sites and the restriction enzyme sites used for Southern blot analysis. A Southern blot is shown that analyzes individual, G418-resistant subclones transduced with the indicated promoter insertion vector, allowing one to identify which *Neo* gene was targeted. The genomic DNAs were digested with KpnI and probed for *Neo* sequences. The sizes of promoter-inserted alleles are shown in the adjacent table. (d) The genomic structure of the UCOE promoter with its two chromosomal genes is shown (*CBX3* and *HNRNPA2B1*), along with the G418-resistance frequencies produced by rAAV vectors containing the indicated full-length and truncated UCOE promoter fragments. The boundaries of the UCOE fragments are shown relative to the transcription start site of *HNRNPA2B1*. \*, <  $3 \times 10^{-5}$ . Data represent mean  $\pm$  SEM of three.

# Figure S2

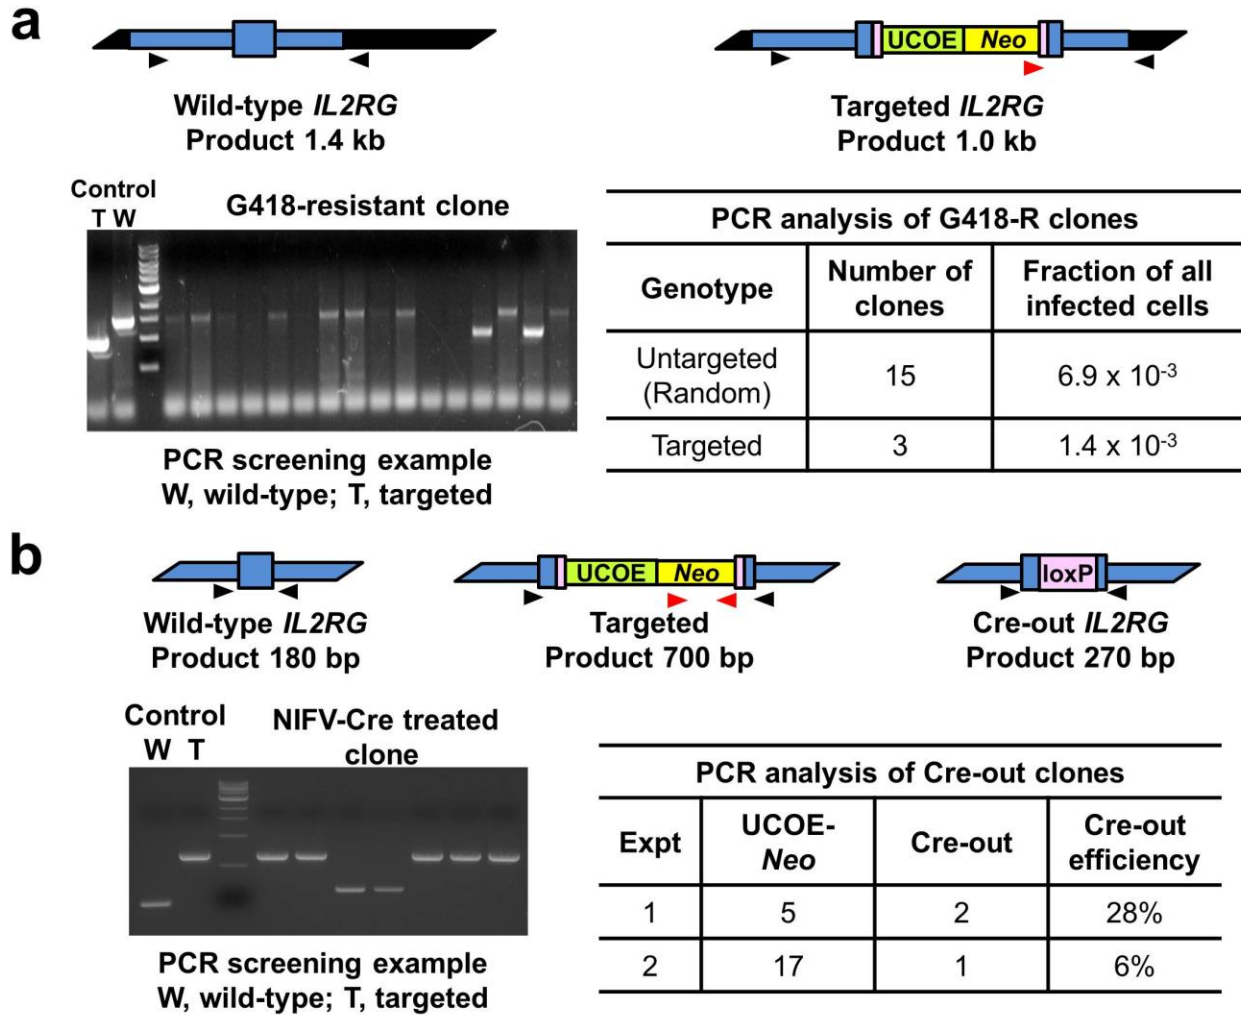

**Figure S2. *IL2RG* targeting and UCOE-Neo removal.** (a) Identification of *IL2RG*-targeted clones by PCR. The structures of wild-type and targeted *IL2RG* loci are shown with primer binding sites indicated as triangles. An example of a multiplex PCR screening gel is shown with wild-type and targeted clones. (b) Identification of Cre-out clones. The structures of wild-type, targeted, and Cre-out *IL2RG* loci are shown with four primer binding sites indicated as triangles. Multiplex PCR was performed on clones after transducing with a non-integrated foamy virus that transiently expresses Cre recombinase. The efficiency of UCOE-Neo transgene removal is calculated as the number of Cre-out clones / (number of targeted clones + number of Cre-out clones) × 100.

# Figure S3

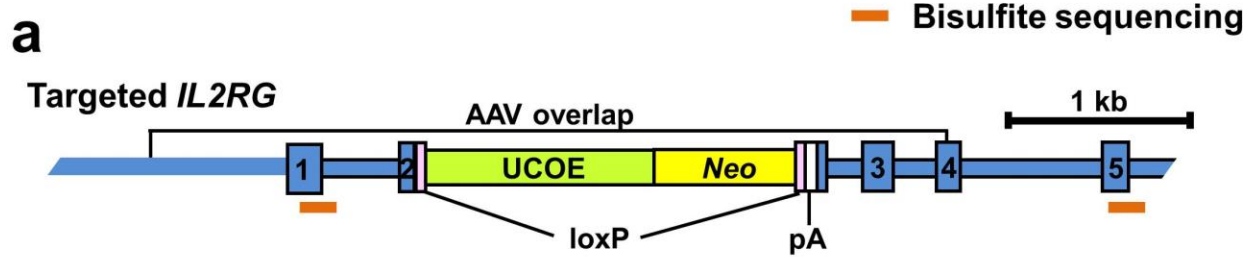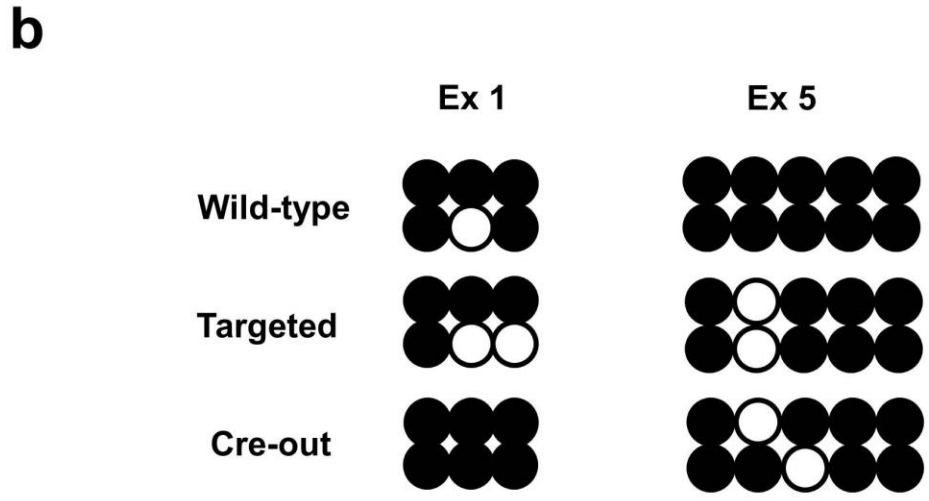

**Figure S3. CpG methylation at the *IL2RG* locus.** (a) Structure of the UCOE-*Neo* targeted *IL2RG* locus shown with rAAV overlap, loxP sites, and the locations of bisulfite sequencing fragments. The *IL2RG* locus contains no CpG islands. (b) Open and filled circles indicate unmethylated and methylated cytosines respectively in the CpGs assayed in exons 1 and 5.

# Figure S4

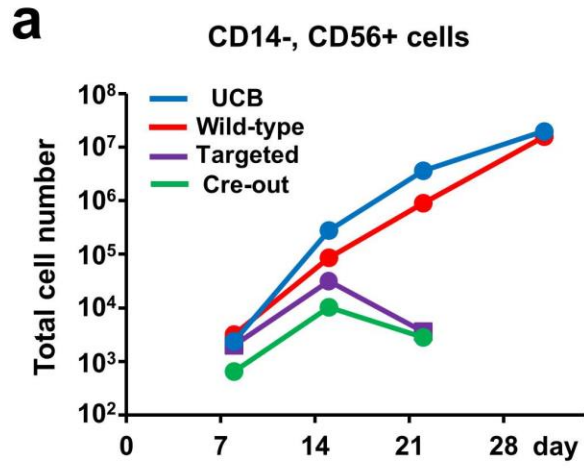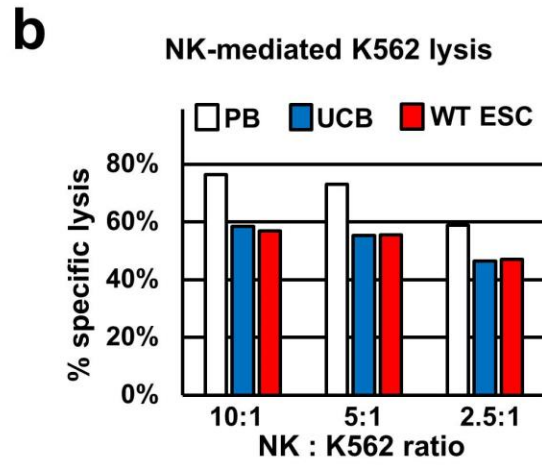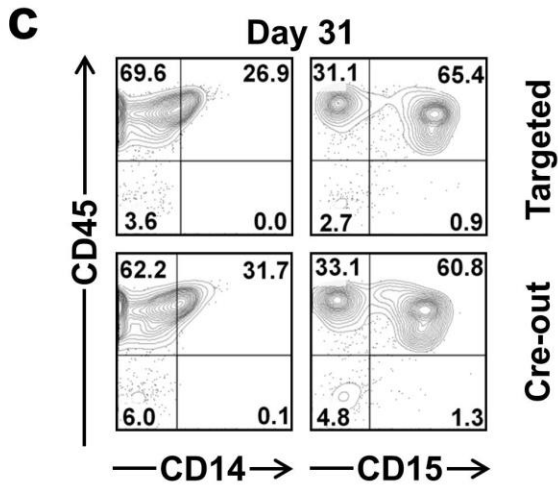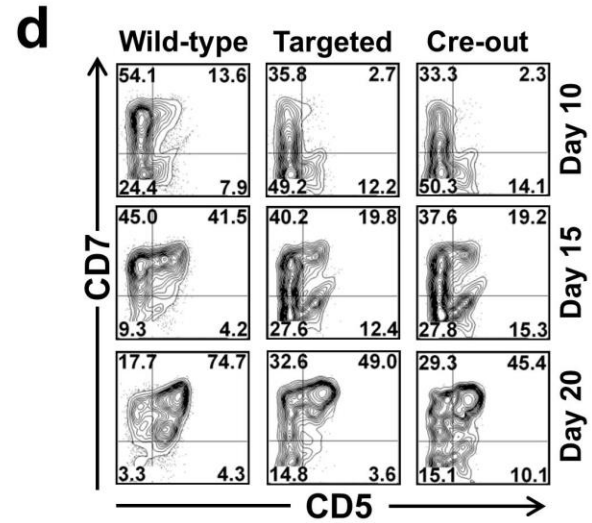

**Figure S4. Characterization of T and NK cells derived from ESCs.** (a) Total number of CD14-, CD56+ NK lineage cells produced during NK differentiation of UCB, or wild-type, *IL2RG*-targeted and Cre-out EBs. (b) Chromium release assays showing lysis of MHC-negative K562 cells by peripheral blood (PB)-, UCB-, or wild-type ESC-derived NK cells. NK:K562 cell ratios are indicated. (c) Flow cytometry analysis showing surface expression of CD45 (hematopoietic), CD14 (monocyte) and CD15 (granulocyte) markers in cells obtained after four weeks of NK differentiation from *IL2RG*-targeted and Cre-out EBs. (d) Flow cytometry analysis of surface expression of lymphoid markers CD5 and CD7 on different days of T cell differentiation in wild-type, *IL2RG*-targeted and Cre-out EBs.



**Table S1. Primer Sequence**

| <b>qRT-PCR for gene expression</b>                 |                             |
|----------------------------------------------------|-----------------------------|
| COL1A1 forward                                     | TGCCGTGACCTCAAGATGTG        |
| COL1A1 reverse                                     | CTCGTGCAGCCATCGACAGT        |
| IL2RG forward                                      | ATGTTGAAGCCATCATTACCA       |
| IL2RG reverse                                      | GGCATAGTGGTCAGGAAGAA        |
| SNX12 forward                                      | GGCGCTACAGTGACTTTGAGTG      |
| SNX12 reverse                                      | CCGGGACGTAGTTCCTGTCAAT      |
| FOXO4 forward                                      | CATCAGCCAGGCCATTGAAAGC      |
| FOXO4 reverse                                      | CAGGGTTCAGCATCCACCAAGA      |
| MED12 forward                                      | TACCAGAGCACCCACCCTTCTA      |
| MED12 reverse                                      | TGCTGCTGCTGCTGCTCAGGTA      |
| NLGN3 forward                                      | CCCTGCAACTTCTCCAAGAATG      |
| NLGN3 reverse                                      | GTTGGCCTTGGTGTGAATGAAC      |
| TEX1 forward                                       | AACCACCTTACCTCCTTCAAG       |
| TEX1 reverse                                       | AGCATCTCGGGACAATGTATC       |
| SLC7A3 forward                                     | GCCAGTGGTCAGTTCATTG         |
| SLC7A3 reverse                                     | GAGGCAAAGCAGGCACCTTAA       |
| GJB1 forward                                       | CCTTCCTCCCTGGCTACTTC        |
| GJB1 reverse                                       | GTCGGAGCATCCCATCTCTTG       |
| ZMYM3 forward                                      | TGCAGAGGCTGAGGAGTTAGA       |
| ZMYM3 reverse                                      | CCCAGGCTCATCCAAGACATT       |
| NONO forward                                       | CGGCAGCAAGAAGAAATGATG       |
| NONO reverse                                       | GGCACCTCTGTTGTTTATGCC       |
| ITGB1BP2 forward                                   | CCTGCGTTTAACTGGGTGAAG       |
| ITGB1BP2 reverse                                   | AGCCTTGACCAGGGAGATTTT       |
| GAPDH forward                                      | GAAATCCCATCACCATCTTCCAG     |
| GAPDH reverse                                      | ATGAGTCCTTCCACGATACCAAAG    |
| <b>qPCR for homologous recombination frequency</b> |                             |
| REX1 forward                                       | AGCCTGATTAGACCGCGTCAGT      |
| EPCAM forward                                      | TAGTCCTTCGGCGAGCGAGCACCTT   |
| UCOE forward                                       | GAGTCCGGTTCGTGTTTCGTC       |
| EF1 $\alpha$ forward                               | GCCGCCAGAACACAGCTGAA        |
| mPgk forward                                       | TCATCTCCGGGCCTTTTCGAC       |
| hPGK forward                                       | GGCTCCCTCGTTGACCGAATC       |
| Neo reverse1                                       | AGCCAACGCTATGTCCTGATA       |
| Neo reverse2                                       | CACGGGTAGCCAACGCTATGTCCTG   |
| <b>Bisulfite PCR</b>                               |                             |
| CpG forward                                        | TTTTTATTAGGATAGTATAAAAGGGTT |

|                                          |                              |
|------------------------------------------|------------------------------|
| CpG reverse                              | AACTTCCAAAAAACTACTTCCTTCAC   |
| <b>IL2RG targeting screening</b>         |                              |
| IL2RG untargeted forward                 | GAGGGGTAGTGGGTGAGGGA         |
| IL2RG targeted forward                   | GACCGCTTCCTCGTGCTTTACGGTATCG |
| IL2RG reverse                            | ACGTCCCTAGTCACTCACAGTC       |
| <b>IL2RG transgene removal screening</b> |                              |
| UCOE-Neo forward                         | TCGGCGTTAATTTCAAACCTG        |
| UCOE-Neo reverse                         | TCGGTCTTGACAAAAAGAACC        |
| IL2RGex2 flanking forward                | CCACTGACTCCCTCAGTGTTTC       |
| IL2RGex2 flanking reverse                | TCTCTGATCCAACCCACCTCTT       |
| <b>COL1A1 targeting CHIP</b>             |                              |
| A-forward                                | TGCCCTAGACCACCACTCTAA        |
| A-reverse                                | GACCATGTGGCAGCAACTTGT        |
| B-forward                                | CACGCATGAGCGGACGCTAA         |
| B-reverse                                | AAGCGGCTTCGGCCAGTAAC         |
| C-forward                                | CGGCCATTGAACAAGATGGA         |
| C-reverse                                | TCGGTCTTGACAAAAAGAACC        |
| D-forward                                | GTGCCGTCTTCTGCCTTTCAA        |
| D-reverse                                | TGGACCTCCCAAGCTGTCTAT        |
| <b>IL2RG targeting CHIP</b>              |                              |
| A-forward                                | TAAGCACAGTGCCTGGCACAT        |
| A-reverse                                | TTCTAAAGGCCCTCTGCTCTC        |
| B-forward                                | TCACACTTCTCGCCAGTCTC         |
| B-reverse                                | CCCGACATCACCGTTCTATGC        |
| C-forward                                | TGACCACTATGCCCACTGACTC       |
| C-reverse                                | GCTGCTGTTCCAAGTGCAATTC       |
| D-forward                                | CCAGCCTACCAACCTCACT          |
| D-reverse                                | TCCAGAGCCTAGCCTCATC          |
| E-forward                                | AAGTCCAGAAGTGCAAGCCACTA      |
| E-reverse                                | GGTCCTGGAGCTGAACAACAAA       |
| F-forward                                | CTGGTGGGTGTTTCAGGAGTAT       |
| F-reverse                                | TTTCTGCCCATCCACACTAGG        |
| <b>Taqman qPCR probe</b>                 |                              |
| Neo forward                              | ATCGCATCGAGCGAGCACGT         |
